# Supplementary material
Source: PubMed Central journal article supplement (PMC9529856)
Supplement: NIHMS1834350-supplement-ESI.pdf [file NIHMS1834350-supplement-ESI.pdf]

## Supporting Information

### Point-of-care SARS-CoV-2 sensing using lens-free imaging and a deep learning-assisted quantitative agglutination assay

Colin J. Potter,<sup>ab</sup> Yanmei Hu,<sup>c‡</sup> Zhen Xiong,<sup>a</sup> Jun Wang,<sup>c‡</sup> and Euan McLeod<sup>a\*</sup>

<sup>a</sup> Wyant College of Optical Sciences, University of Arizona, Tucson, Arizona 85721, USA

<sup>b</sup> College of Medicine, University of Arizona, Tucson, Arizona 85724, USA

<sup>c</sup> Department of Pharmacology, University of Arizona, Tucson, Arizona 85724, USA

<sup>‡</sup>Present address: Ernest Mario School of Pharmacy, Rutgers, the State University of New Jersey, Piscataway, New Jersey 08854

\*euanmc@optics.arizona.edu

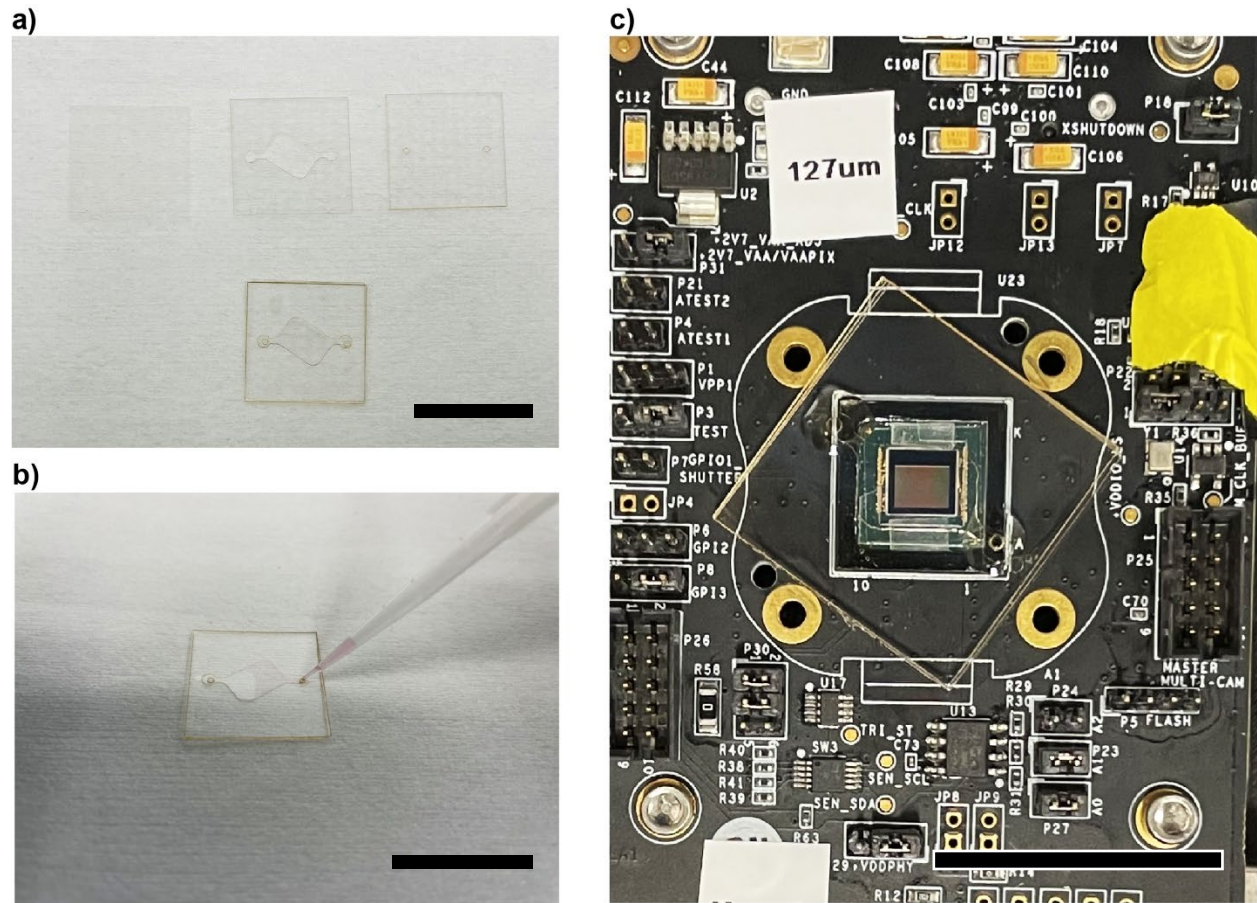

**Figure S1:** **a)** Imaging chamber components, from left to right on top: glass coverslip, 125 μm thick polycarbonate (PC) chamber spacer, 250 μm thick PC cover. **b)** Imaging chamber filling with 1:1 DMEM + pseudovirus and PBS + latex bead suspension. **c)** Imaging chip placed on top of image sensor inside the portable LFHM. Scale bars = 25 mm.

a)

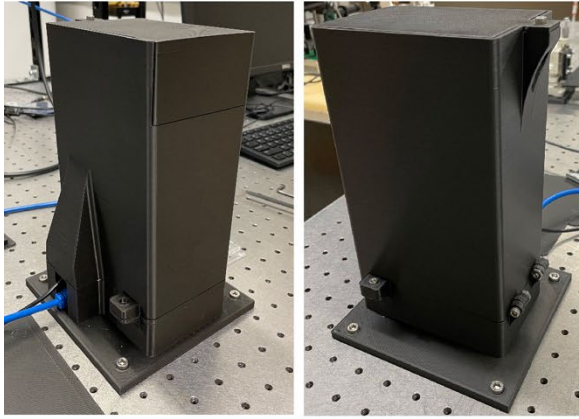

b)

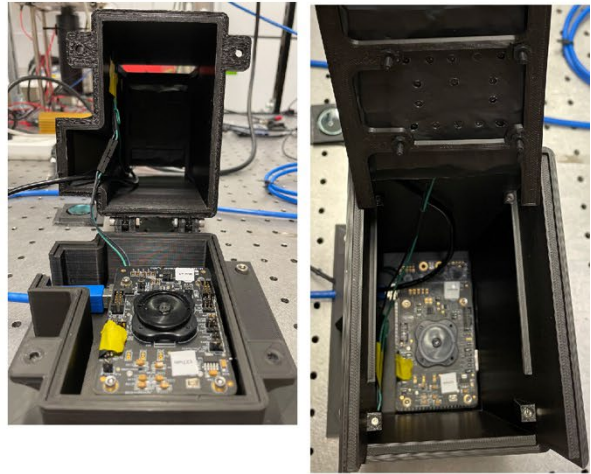

c)

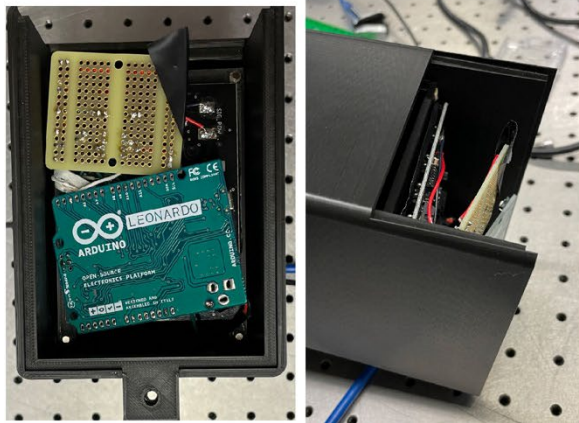

**Figure S2:** a) External view of portable LFHM housing. Top portion is hinged to facilitate loading of imaging chamber into the biosensor. b) Placement of image sensor within the base of the housing. c) Custom LED array and Arduino Leonardo microcontroller in top compartment of the housing. The underlying optical table has holes on a one-inch grid.

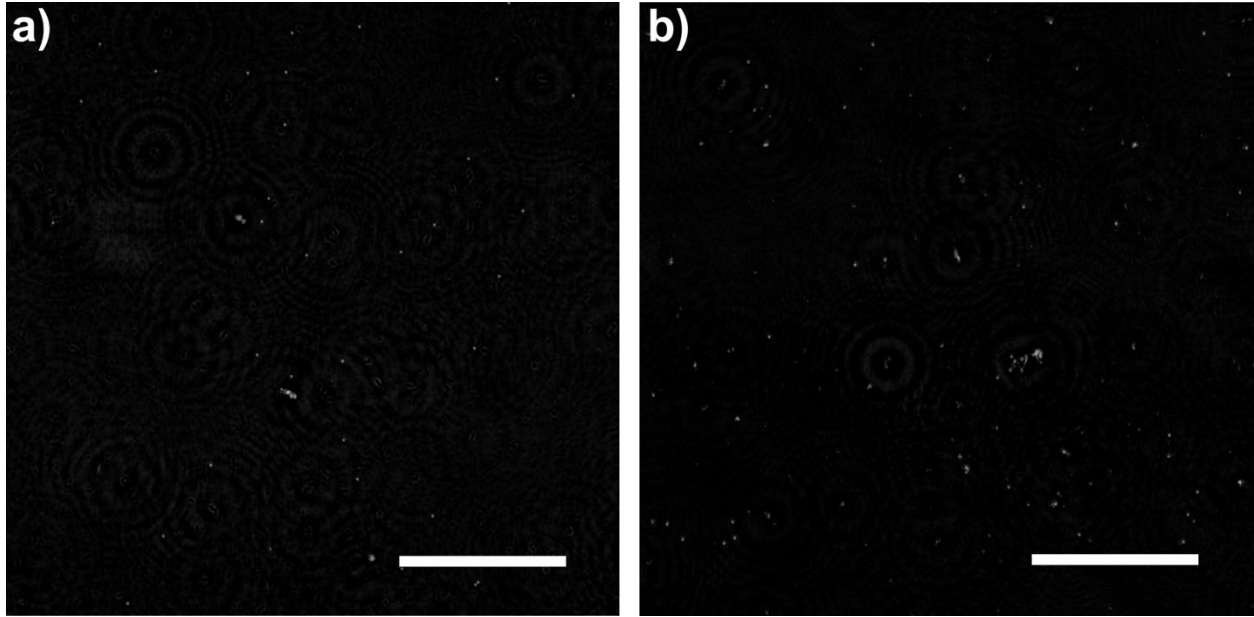

**Figure S3): a)** Representative image of sample of filtered SARS-CoV-2 pseudovirus with 0.0025% latex beads. Despite filtering, there is still debris present. **b)** Representative image of sample of unfiltered SARS-CoV-2 pseudovirus with 0.005% latex beads. Without filtering, there is more debris and particle irregularity. Scale bars = 150  $\mu\text{m}$ .
